# Supplementary material for: Opposite Roles of RNase and Kinase Activities of Inositol-Requiring Enzyme 1 (IRE1) on HSV-1 Replication
Source: MDPI journal article supplement (doi:10.3390/v9090235), 2017-08-23
Supplement: s1 [file s1]

**Figure S1**

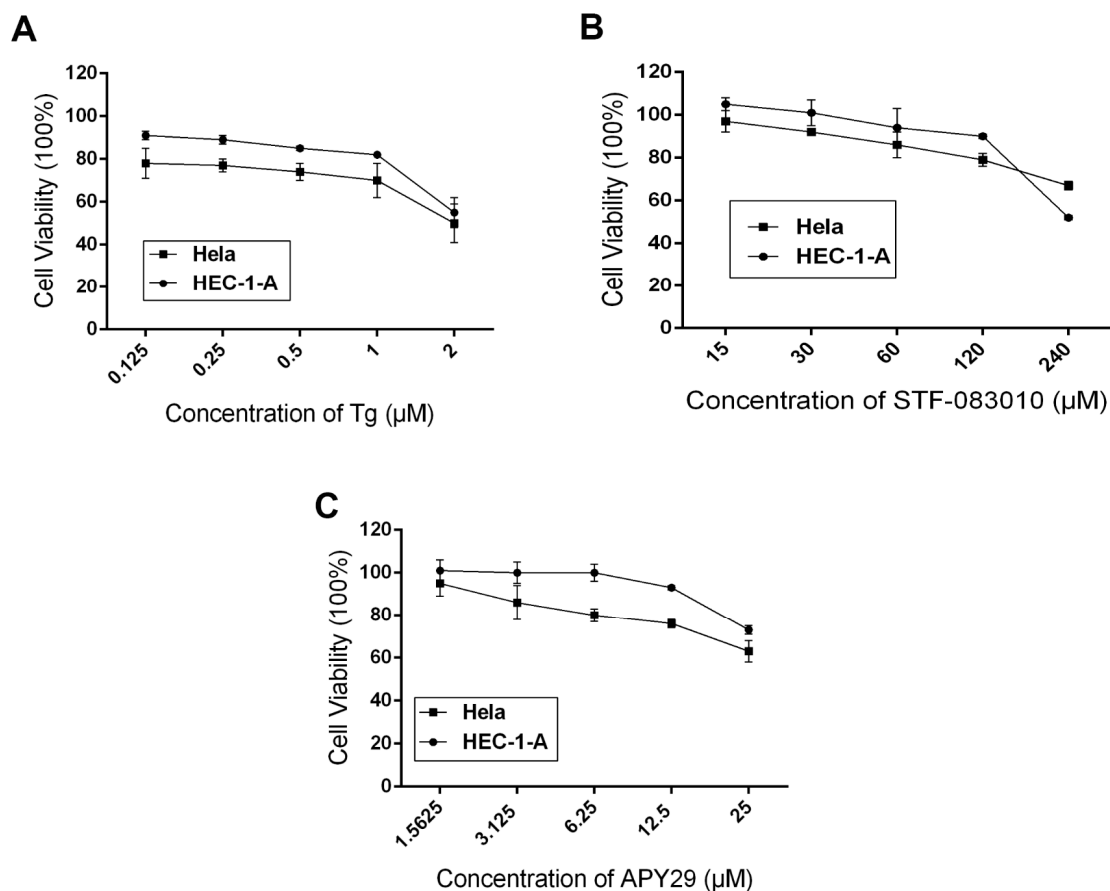

Figure S1: The in vitro cytotoxicity of Tg (A), STF-083010 (B) and APY29 (C) was measured using a commercial CCK-8 kit (Dojindo, Kumamoto, Japan) via colorimetric method according to the manufacturer's instructions. Briefly,  $2 \times 10^4$  cells per well were seeded into 96-well plates and cultured for 24 hrs before serial concentrations of drugs were added in triplicate. After 24 hrs, 10  $\mu\text{l}$  CCK-8 reagent was dispensed into each well, and the plates were incubated at 37°C for 3 hrs. Absorbance at 450nm was measured using a TECAN Infinite M200 microplate reader (Männedorf, Switzerland). Cell viability was plotted as the percent viable cells of the mock-treated control cells. All experiments were performed three times. The representative results were shown. Data are mean values ( $\pm$ SD) of triplicate determinations.
